# Supplementary material for: A solution-processed yttrium oxide gate insulator for high-performance all-solution-processed fully transparent thin film transistors
Source: Royal Society of Chemistry journal article supplement (doi:10.1039/c2jm34162j), 2012-01-01
Supplement: c2jm34162j.pdf [file c2jm34162j.pdf]

## Supplementary Information

### Solution-Processed Yttrium Oxide Gate Insulator for High-Performance All-Solution-Processed Fully Transparent Thin Film Transistors

Keunkyu Song, Wooseok Yang, Yangho Jung, Sunho Jeong, and Jooho Moon\*

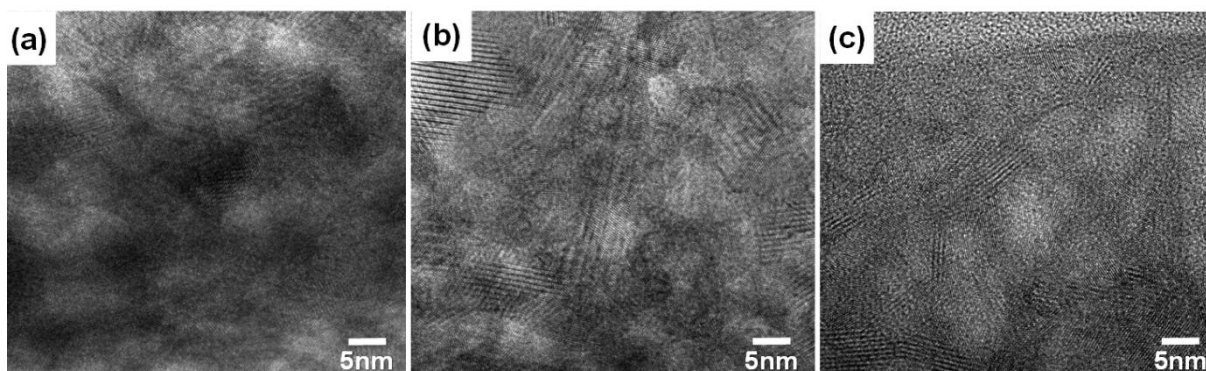

**Figure S1.** HR-TEM images show crystallinities of the spin-coated  $\text{YO}_x$  as a function of the annealing temperature of (a) 300 °C, (b) 400 °C, and (d) 500 °C. Enhanced crystallinity with increasing annealing temperature is apparent.

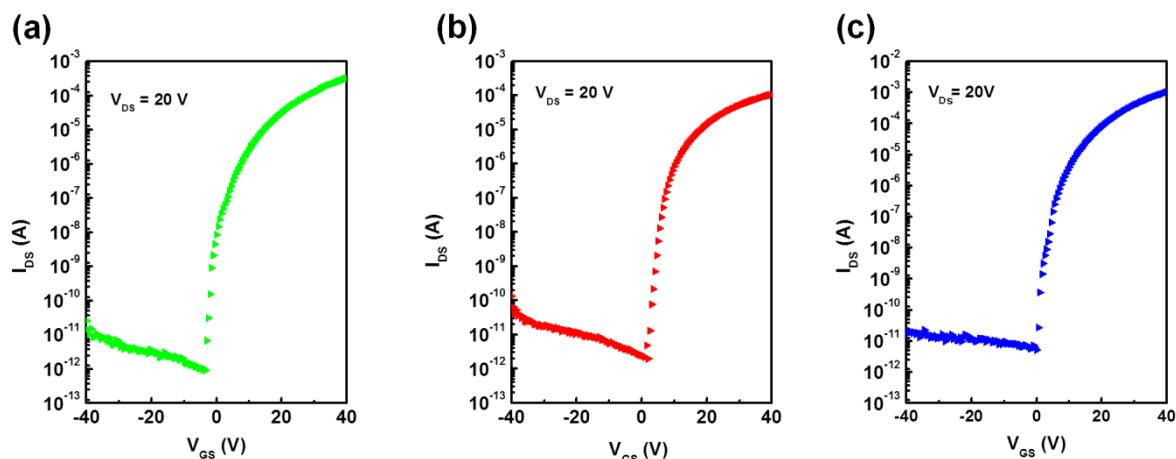

**Figure S2.** Transfer characteristics of (a) ZnO (annealed at 350 °C), (b) ZTO (annealed at 500 °C), and (c) ZnO (annealed at 400 °C) TFTs with thermally grown silicon oxide are plotted. Soluble ZnO and ZTO semiconductors were spin-coated onto cleaned  $\text{SiO}_2$  (thermal grown)/heavily doped Si substrates. Channel width and length are 3000  $\mu\text{m}$  and 120  $\mu\text{m}$ , respectively. Field-effect mobility and threshold voltage were calculated from transfer characteristics for each TFT (a) ZnO-TFTs:  $2.41 \text{ cm}^2 \text{ V}^{-1} \text{ s}^{-1}$  and 10.76 V, (b) ZTO-TFTs:  $0.74 \text{ cm}^2 \text{ V}^{-1} \text{ s}^{-1}$  and 8.43 V. (c) ZnO-TFTs with thermally grown  $\text{SiO}_2/\text{Si}$  substrate:  $10.5 \text{ cm}^2 \text{ V}^{-1} \text{ s}^{-1}$  and 14.09 V.

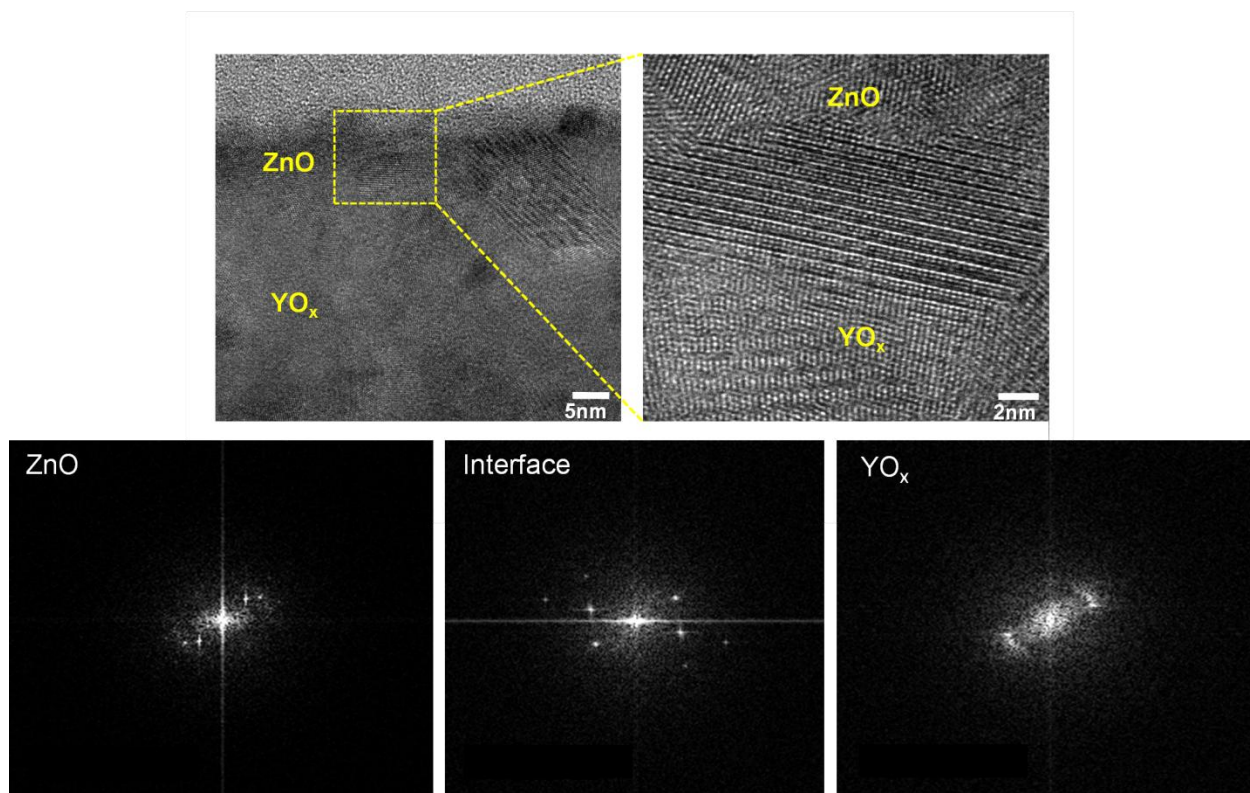

**Figure S3.** HR-TEM images of the interfaces between solution-processed ZnO semiconductor (annealed at 400 °C) and YO<sub>x</sub> gate dielectric (annealed at 400 °C). Local homogenous lattice match forms at near the channel, suggesting that these well-defined interfaces lead to enhanced performance of solution-processed oxide TFTs. Three FFT images obtained across the ZnO-YO<sub>x</sub> boundary are different one another and the spots observed in the image at the interface are discernible.
